1 **Evolution of cross-tolerance to environmental stresses in populations of *Drosophila***  
2 ***melanogaster* selected for increased resistance to cold stress**

3

4 Karan Singh<sup>a\*</sup>, Nagaraj Guru Prasad<sup>b</sup>

5

6 <sup>b</sup>Affiliations:

7 Indian Institute of Science Education and Research Mohali,

8 Knowledge City, Sector 81, SAS Nagar, PO Manauli, Punjab 140306, India

9 Ph: 91 172 2240266, 2240124

10 Fax: 91 172 2240266, 2240124

11 E-mail: [prasad@iisermohali.ac.in](mailto:prasad@iisermohali.ac.in)

12

13 <sup>a</sup>Current affiliation

14 NYU Langone Health, 650MSB, 550 First Ave, New York, NY-10016, USA

15 Email: [Karan.iiser@gmail.com](mailto:Karan.iiser@gmail.com), [Karan.Singh2@nyulangone.org](mailto:Karan.Singh2@nyulangone.org)

16 Tele+1-267-881-3908

17

18 <sup>a</sup>Previous affiliation

19 Indian Institute of Science Education and Research Mohali,

20 Knowledge City, Sector 81, SAS Nagar, PO Manauli, Punjab 140306, India

21 Ph: 91 172 2240266, 2240124

22 Fax: 91 172 2240266, 2240124

23 E-mail: [karan.iiser@gmail.com](mailto:karan.iiser@gmail.com)

24

25 \* Corresponding Author

26

27 **Running short title:** Evolution of correlated response to selection

28 **Keywords:** reproductive behavior, desiccation resistance, heat resistance, starvation resistance,  
29 egg viability and mating number.

30 **Abstract**

31 Empirical studies on the promiscuous species of *Drosophila* revealed that the laboratory  
32 evolution of resistance to a certain type of environmental stress can impact the ability of the  
33 organism to resist other kinds of stresses. The mechanisms of resistance to a particular stress are  
34 specialized and costly, then, mechanisms of resistance to other stresses can be negatively  
35 affected. However, it is also possible that at least a part of the stress resistance mechanisms is  
36 generic. With this premise we aimed to understand whether increased resistance to a cold stress  
37 can increase resistance to other types of stresses.

38 To address this issue, we used populations of *Drosophila melanogaster* (*D. melanogaster*) that  
39 have been selected for 57-71 generations for increased resistance to cold shock (-5°C for one  
40 hour). We subjected the selected (FSB; selected for cold shock resistance, derived from BRB  
41 population) and control FCB; cold shock control, derived from BRB population) populations to a  
42 variety of environmental stresses such as cold shock, heat shock, starvation, desiccation and  
43 bacterial infection. We found that the compared to FCB populations, FSB populations had higher  
44 resistance to heat stress in terms of adult survivorship and mating ability post cold or heat shock.  
45 Desiccation resistance was observed higher in FSB females compared to FCB females but no  
46 such difference was found in males. We observed that FSB populations had lower starvation

47 resistance relative to FCB populations. There was no difference between FSB and FCB  
48 populations in their ability to survive post bacterial infection. Our findings suggest that resistance  
49 to heat stress and desiccation (in females) are positively correlated with increased resistance to  
50 cold shock. However, resistance to starvation was negatively correlated with increased resistance  
51 to cold shock.

52

### 53 **1. Introduction**

54 Empirical evolution of resistance to an environmental stress may confer an advantage or a  
55 disadvantage with respect to resistance to other types of environmental stresses. A large number  
56 of earlier studies have suggested that resistance to multiple stresses (such as desiccation and  
57 starvation, high and low temperature, starvation and cold temperature) might be correlated  
58 (Nghiem et al., 2000, Hoffmann et al., 2003 and Bublly and Loeschcke, 2005). Other studies  
59 have investigated, if there are certain universal mechanisms that allow organisms to concurrently  
60 increase resistance to multiple environmental stresses (reviewed in Hoffmann and Parsons,  
61 1991). Multiple studies have documented increased cross-tolerance in insects indicating that  
62 either the underlying mechanisms of resistance to these stresses are common or that there are  
63 strong genetic correlations between resistance traits. Such positive correlation has been found  
64 between resistance to cold and desiccation as well as between resistance to heat and desiccation  
65 (Bayley et al., 2001, Wu et al., 2002, Phelan et al., 2003, Bublly and Loeschcke, 2005 and  
66 Vermeulen and Loeschcke, 2007). Cross-tolerance with respect to high and low temperature  
67 stress has also been explored. For example, exposure to mild desiccation can increase cold  
68 tolerance in the springtail, *Folsomia candida* (Bayley et al., 2001), house flies subjected to  
69 anoxic conditions at 27°C show greater tolerance when exposed to -7°C (Coulson and Bale,

70 1992). Positively correlated responses in stress resistance traits have also been observed in  
71 laboratory selection studies. For example, Bublly and Loeschcke (2005) observed increased cold  
72 stress resistance in lines selected for resistance to heat stress or desiccation stress. They also  
73 observed increased desiccation resistance in lines selected for resistance to heat knock down.  
74 Chill-coma recovery, cold resistance and desiccation are known to be positively correlated  
75 (Sinclair et al., 2007 and Anderson et al., 2005).

76 Alternatively, mechanisms required to adapt to a specific type of stress might conflict with  
77 mechanisms required to adapt with other kinds of stress, thereby leading to trade-offs across  
78 stress resistance traits (Kellett et al., 2005 and Overgaard et al., 2006). For example, Hoffmann et  
79 al. (2005a) showed that flies selected for starvation resistance have decreased resistance to cold,  
80 whereas those selected for increased cold resistance show decreased starvation resistance. Quite  
81 often though, the relationship between resistances to various stresses seems to be complex.  
82 Bublly and Loeschcke (2005) found a positive correlation between resistance to cold stress and  
83 desiccation. However, Sinclair et al. (2007), found no change in cold resistance in populations  
84 selected for desiccation resistance. Though it has been suggested that resistance to the multiple  
85 stresses that insects commonly encounter in nature (such as temperature extremes, desiccation  
86 etc.) should be positively correlated, the evidence for such correlations is variable (Ring and  
87 Danks, 1994).

88

89 In this study, our major goal was to assess whether increased resistance to cold shock leads to  
90 correlated response with other environmental stresses such as resistance to desiccation,  
91 starvation, heat shock, and pathogenic challenge. Our study consisted of 10 populations of *D.*

92 *melanogaster* (5 selected populations and 5 control populations), and experiments were  
93 conducted over 57-71 generations of selection.

94

95 We specifically addressed the following questions:

96 (a) Does egg viability and reproductive behavior post heat shock evolve as a correlated response  
97 to increased resistance to cold shock?

98 (b) Does adult survival under starvation, desiccation, heat shock, cold shock, and resistance to  
99 pathogenic challenge evolve in the selected populations of *D. melanogaster*?

100

## 101 **2. Materials and Methods**

### 102 *2.1 Stock populations*

103

#### 104 *2.1.1 Blue Ridge Base line population*

105 Maintenance and derivation of Blue Ridge Base line populations have been thoroughly described  
106 in our previous study (Singh et al., 2015).

107

#### 108 *2.1.2 Derivation and maintenance of selected and control populations*

109 Derivation and maintenance of selected (FSB; selected for cold shock resistance (non-lethal cold  
110 shock of -5°C for one hour), derived from BRB population) and control (FCB; cold shock  
111 control, derived from BRB population) populations have been explained in detailed in Singh et  
112 al. (2015).

113

### 114 *2.2 Experimental protocol*

### 115 *2.2.1 Standardization of flies*

116 To control over the non-genetic parental effects for selected and control populations (Rose 1984  
117 and Crill et al., 1996, Singh et al. 2015, Singh et al. 2016a), all the populations (FSB1-5 and FCB  
118 1-5) were passed through one generation common laboratory rearing conditions as described  
119 below, before any experimental egg collection. During this generation, the FSB populations were  
120 not imposed selection pressure (-5°C for one hour). This process known as ‘standardization’ and  
121 the flies maintained in this manner are known as ‘standardized flies’. In order to standardize,  
122 eggs were cultured from each of the FSB and FCB stock populations. Eggs from each of FSB  
123 and FCB population were transferred into culture vials containing standard banana-yeast-jaggery  
124 (here-to-forth referred to as “standard food”) at a density of 70 eggs per vial. For each of the FSB  
125 and FCB populations, 20 such vials were set up. These vials were incubated at standard  
126 laboratory conditions (25°C temperature, 50-60% RH, 12:12hours cycle from day to night on  
127 standard food). On the 12th day after egg collection, the flies from a specific population were  
128 shifted into a Plexiglas cage provided with standard food. In order to collect experimental eggs,  
129 on the 13th day after egg collection, a fresh standard food plate was given and the flies were  
130 allowed to oviposit for 6 hours. Adults emerging from these vials (i.e., the progeny of the  
131 standardized flies) were used for experimental assays. All the experiments done in the present  
132 study were conducted over 57 to 71 generations of selection.

133

### 134 *2.2.2 Cold shock*

135 Flies were subjected to cold shock as explained by Singh et al., (2015). Briefly, on 12th day after  
136 egg collection (2-3 days post eclosion), flies were transferred to clean dry glass vials (25mm  
137 diameter × 90mm height) at a density of 50 individuals per vial (in mixed sex groups or single

138 sex groups as per the assay's requirements). The cotton plug was pushed deep into the vial such  
139 that the flies were allowed to stay in the bottom of the vial (one third of the total volume of the  
140 vial which is roughly 25mm diameter × 30mm length of the vial). The vials were then shifted in  
141 ice-salt-water slurry maintained at -5°C and kept for one hour. Post cold shock, the flies were  
142 then immediately transferred to Plexiglas cages (14cm length × 16cm width × 13cm height) at a  
143 density of 100 pairs (100 males and 100 females) per cage. The cage was provided with a Petri  
144 plate having standard food.

145

### 146 *2.2.3 Heat shock*

147 Flies were handled in a similar way as described above for the cold shock treatment with the  
148 exception that experimental flies were subjected to 37.5°C in water bath for one hour (instead of  
149 being exposed to -5°C). After heat shock, flies were immediately transferred into Plexiglas cage  
150 provided with standard food plate.

151

### 152 *2.2.4 No shock*

153 In this treatment flies were also handled in an identical way as described in the cold shock  
154 treatment (see above) with the an exception that vials containing flies were placed in a water bath  
155 maintained at 25°C temperature for one hour. Following this, the flies were immediately  
156 transferred into Plexiglas cage provided with food plate.

157

## 158 *2.3 Experiment 1: Effect of heat or cold stress on the mating ability and egg viability*

159

160 In one of our previous studies we observed that both mating and egg viability are influenced by  
161 cold shock. We found that populations of *D. melanogaster* selected against cold shock had  
162 higher egg viability and mating frequency relative to their control populations (Singh et al.,  
163 2015). In this experimental setting, we wanted to investigate whether egg viability and mating  
164 frequency are also correlated with heat shock like with cold shock. After 60 generations of  
165 selection, experimental flies were raised followed by one generation of standardization as  
166 described above. Twelve vials of fixed density of 70eggs/vial were established for each FSB and  
167 FCB populations from the respective standardized populations. On 12th day (by the time almost  
168 all flies had emerged and mated) after egg collection, 4 vials were randomly assigned to one of  
169 the following three treatments.

170       **(a) Cold-shock:** Both males and females from a given population were imposed to cold  
171 shock (as described above in cold shock treatment) and following this, flies were immediately  
172 transferred into a Plexiglas cage at a density of 100 mating pairs per cage.

173       **(b) Heat-shock:** Both males and females from each FSB and FCB populations were  
174 subjected to (heat shock as describe above) and after that flies were quickly transferred to the  
175 Plexiglas cage at a density of 100 mating pairs per cage.

176       **(c) No-shock:** Both males and females from each of FSB and FCB populations were  
177 subjected to a temperature of 25°C for one hour (as described above) and subsequently  
178 transferred to a Plexiglas cage at a density of 100 mating pairs per Plexiglas cage.

179

180 *2.3.1: Assayed the egg hatchability at two points -*

181       (a) 0-hour post cold shock/heat shock/no shock and

182       (b) 24 hours post cold shock/heat shock/no shock.



183  
184 We selected these two time points because of the following reason; first, egg viability  
185 measurement at 0 hours post shock would demonstrate the immediate impact of treatment.  
186 Second, in their normal maintenance cycle eggs are collected from the flies 24 hours after cold  
187 shock to start the next generation and therefore it is crucial time point to the fitness of the flies.  
188 To measure the egg viability, 0 hours or 24 hours post cold shock/ heat shock/ no shock, a fresh  
189 standard food plate was kept in the cage for flies to lay eggs for 6 hours. A group of 200 eggs  
190 were transferred to a Petri plate containing 1.2% agar from the standard food plate. Following  
191 this, these plates were incubated at standard laboratory conditions as described above for 48  
192 hours, after which, the numbers of hatched eggs were counted as a measurement of the egg  
193 viability.

#### 194 *2.3.2: Assayed the mating ability*

195 We monitored the total number of mating for all the three treatments. Once the flies were  
196 transferred to Plexiglas cages, we observed the cages every half an hour and recorded the total  
197 number of mating pairs. We followed the protocol of monitoring mating pair as we described  
198 previously (Singh et al., 2015). We tracked mating pairs every 30 minutes intervals until 36  
199 hours post treatment (cold shock/heat shock/no shock). We then summed the number of mating  
200 pairs across all the observations for a given cage to obtain an estimate of the total number of  
201 mating. The total number of mating pairs per cage was used as the unit of analysis.

202

#### 203 *2.4 Experiment 2: Effect of heat or cold stress on adult survivorship*

204 We wanted to check whether adult survivorship has changed in the selected populations (FSB)  
205 after 63 generations of selection. We also wanted to probe whether the population selected for

206 increased resistance to cold shock could show cross-tolerance to other stress i.e. heat shock. We  
207 already knew from previous studies that both cold shock and heat shock influence adult  
208 survivorship (Tucic, 1979, Chen and Walker, 1993, Rohmer et al., 2004 and MacMillan et al.,  
209 2009). We collected eggs to generate experimental flies after 63 generations of selection  
210 following one generation of standardization. Twenty five vials (70eggs/vial) were set up for each  
211 FSB and FCB population. Virgin males and females were collected on the 9-10th days post egg  
212 collection from the peak of eclosion using mild CO<sub>2</sub> anesthesia and were housed separately in  
213 single sex vials at density 10 flies/vial. On the 12th days post egg collection 50 flies were  
214 transferred into an empty glass vial and cotton plug was pushed deep into the bottom one third of  
215 vial to allow flies to stay in a restricted space. Followed by vials were randomly assigned one of  
216 the following treatments:

217       **(a) Cold shock:** Vials containing female flies were exposed to -5°C in ice-water-salt  
218 slurry for one hour (as described above). Male flies were handled identical manner as described  
219 above except that they were exposed to -5.6°C (we used -5.6°C to get at least 50% mortality post  
220 cold shock) instead of -5°C for one hour in ice-water-salt slurry.

221       **(b) Heat shock:** Both male and female flies were handled similar ways as described  
222 above for heat shock treatment in the previous experiment except that the temperature was  
223 different in the following manner because male were more susceptible at higher temperature:

224 (1) Vials containing male flies were exposed to 39°C temperature for 1 hour in water-bath.

225 (2) Vials containing female flies were subjected to 39.2°C temperature for 1 hour in water-  
226 bath.

227 Three replicate Plexiglas cages of 100 flies per cage density were set up for each treatment,  
228 population, block and sex. We measured adult survivorship at 24 hours post stress. We selected

229 this time point because 24 hours post cold shock is the time that eggs are collected from the flies  
230 to start the next generation in their normal maintenance cycle and it is hence directly relevant to  
231 the fitness of the flies. Twenty four hours post cold shock, dead flies (if any) were aspirated out  
232 of the cage and counted. Mean percentage mortality of each cage was used as the unit of  
233 analysis.

234

### 235 *2.5 Experiment 3: Starvation Resistance*

236 Sex specific starvation resistance assay was carried out after 57 generations of selection.  
237 Experimental eggs were collected from standardized flies and reared them at density of  
238 70eggs/vials in standard food at standard laboratory condition as aforementioned. Assay was  
239 carried out using the method described in Kwan et al. (2008) with minor modifications. Ten vials  
240 were established for each FSB and FCB populations. Virgin flies were collected on 9th and 10th  
241 days during peak of eclosion, employing mild CO<sub>2</sub> anesthesia. Males and females were held  
242 separately at a density of 10 flies per vial containing fresh standard food. On the 12th days, flies  
243 were transferred from food vials to 1.24% agar vials (Kwan et al., 2008). For these assay, seven  
244 replicate vials containing 10 flies were set up for each sex and population (FSB and FCB). Flies  
245 were transferred into a fresh agar vial (1.24%) every alternate day until the last fly in a given vial  
246 died. Mortality was recorded every four hours. Mean time of mortality was computed for each  
247 vial and was used as the unit of analysis.

248

### 249 *2.6 Experiment 4: Desiccation Resistance*

250 Sex-specific desiccation resistance assay was performed for each of the FSB (1-5) and FCB (1-5)  
251 populations. After 57 generations of selection, experimental flies were raised from

252 standardization flies of FSB and FCB populations. Ten vials containing eggs at a density of  
253 70eggs/vial were set up for each population. On 9-10th day post egg collection, virgin flies were  
254 collected using light CO<sub>2</sub> anesthesia and were dispensed in vials provisioned with standard food  
255 at a density of 10 virgin males or females in a vial. On 12th day, flies were transferred from food  
256 vials to food-less glass vials containing ~6g of silica gel (desiccant). The flies were separated  
257 from the silica gel by a thin layer of cotton. The open end of each vial was sealed with Parafilm  
258 (Kwan et al., 2008). Seven replicate vials were set up at a density of 10 flies per vial for each  
259 population. Mortality was monitored every half an hour until the last fly died. Mean time to  
260 death was computed for each vial and was used as the unit of analysis.

261

## 262 *2.6 Experiment 5: Resistance to a bacterial infection*

263 We investigated whether flies selected for resistance to cold stress have also evolved resistance  
264 to bacterial infection as a correlated response after 70 generations of selection. To raise the  
265 experimental flies, eggs were collected from standardized flies with fix density 70eggs/vial  
266 containing 6 ml of standard food. Five vials were set up for each population. On 9-10<sup>th</sup> day post  
267 egg collection, virgin males and females were sorted from the peak of eclosion using light CO<sub>2</sub>  
268 anesthesia at very young stage (approximately 4 hours post eclosion) and housed in vials  
269 provisioned with 2ml of standard food at a density of 10 individuals per vial. On day 12 post egg  
270 collection, flies of known age (2-3 days old as adult), population regime and sex (see below for  
271 details) were lightly anaesthetized using CO<sub>2</sub>. Fifty five to sixty flies of each sex for each  
272 population were infected by pricking the thorax with a Minutien pin (0.1 mm, fine Science  
273 Tools, Foster City, CA, USA) dipped in the bacterial slurry (*Staphylococcus succinus* subsp.  
274 *succinus* strain PK-1 is a natural pathogen of *D. melanogaster*, which we isolated from wild

275 captured *Drosophila* (Singh et al., 2016b)) of OD<sub>600nm</sub>2 (Vanessa Corby-Harris et al., 2008). For  
276 sham infection, the pin was dipped in 10mM MgSO<sub>4</sub> prior to pricking the lateral thorax of the  
277 flies. The number of dead flies in each vial was tracked at every 3 hrs intervals till 30 hours post  
278 infection. After this period, vials were observed every hour till 80 hrs post infection. Proportion  
279 of flies that survived the infection was calculated for each population and was used as the unit of  
280 analysis.

281

## 282 *2.7 Statistical analysis*

### 283 *2.7.1 Experiment 1: Effect of heat or cold stress on the mating ability and egg viability*

284 Egg viability data from Experiment 1 was analyzed using four-factor mixed model analysis of  
285 variance (ANOVA) with selection regime (FSB vs. FCB), treatment (Cold shock/ no shock/ heat  
286 shock) and period (0 hour vs. 24hours) as fixed factors crossed with block (1-5) as random  
287 factor. All multiple comparisons were performed employing Tukey's HSD. Mating number data  
288 from Experiment 1 was analyzed using three factor mixed model ANOVA with selection regime  
289 (FSB vs. FCB) and treatment (Cold shock vs. no shock/ heat shock) as fixed factors crossed with  
290 block (1-5) as random factor. All multiple comparisons were performed using Tukey's HSD.

291

### 292 *2.7.2 Experiment 2, 3, 4 and 5*

293 Survivorship post heat or cold stress, starvation resistance, desiccation resistance, mortality post  
294 bacterial infection data from *Experiment 2, 3, 4 and 5* respectively were analyzed using two-  
295 factor mixed model ANOVA treating selection regime (FSB vs. FCB) as a fixed factor crossed  
296 with random block (1-5). We also analyzed the mortality post bacterial infection data from

297 experiment 5 using Kaplan-Meier method. All the analyses were done at  $p = <0.05$  level of  
298 significance using Statistica (for Windows, version 10, StatSoft).

299

### 300 **3. Results**

301

#### 302 *3.1 Experiment 1: Egg viability and mating ability post heat shock or cold shock*

303 Our findings indicate that egg viability evolves in response to selection. We found significant  
304 main effect of selection and treatment on the egg viability (Table 1.1). We also found a two-way  
305 interaction between selection (FCB and FSB) and treatment (Cold shock/heat shock/no shock)  
306 (Table 1.1). Multiple comparisons employing Tukey's HSD suggested that egg viability in no  
307 shocked treatment was more than 90% and there was no significant difference between FCB and  
308 FSB populations (Figure 1.1). Cold shock or heat shock treatment significantly reduced egg  
309 viability (Figure 1.1). At 0<sup>th</sup> hour post cold shock, egg viability was found to be very low  
310 (approximately 2-3%) and post heat shock egg viability was also very low which is about 5-10%.  
311 However, difference between FSB and FCB population was not significant (Table 1.1). Multiple  
312 comparisons using Tukey's HSD suggested that FSB population had greater egg viability when  
313 compared to FCB population 24 hours after cold shock (~41%) or heat shock (~7%) (Figure 1.1,  
314 Table 1.1).

315 We observed significant main effect of selection and treatment on the number of mating pairs.

316 We also found a statistically significant two way selection  $\times$  treatment interaction (Table 1.2).

317 Multiple comparisons using Tukey's HSD indicated that flies subjected to cold shock treatment  
318 show nearly twice as many mating pairs when compared to flies subjected to heat shock or no

319 shock treatment (Figure 1.2). However, in case of neither shock treatment FSB populations had  
320 about 7% more mating pairs compared to FCB populations (Figure 1.2).

321

### 322 *3.2 Experiment 2: Mortality post cold or heat shock.*

323 We quantified the effect of selection on virgin male and female mortality post cold/heat shock  
324 and observed a significant effect of selection on male and female mortality post cold shock  
325 (Table 1. 3a and 3b, Figure 1.3a and 3b). In case of males, 24 hours post cold shock FSB  
326 populations had about 35% lower mortality compared to FCB populations (Figure 1.3a). In case  
327 of females, 24 hours after receiving cold shock, FSB populations had approximately 29% lower  
328 mortality than FCB population (Figure 1.3b). These results indicate that the flies from FSB  
329 population have evolved to significantly lower mortality relative to FCB population.

330 Twenty-four hours post heat shock in males, we found significant effect of selection and block  
331 on male mortality (Table 1.3c). A significant effect of selection suggested that FSB populations  
332 had lower mortality (about 15%) compared to FCB populations (Figure 1.3c). For females, we  
333 found a significant effect of selection on female mortality post heat shock (Table 1.3d). A  
334 significant effect of selection indicated that FSB population had approximately 11% lower  
335 mortality compared to FCB population (Figure 1.3d).

336

### 337 *3.3 Experiment 3: Evolution of starvation resistance*

338 We found that starvation resistance was negatively correlated with resistance to cold stress.  
339 Starvation resistance was significantly lower in the FSB populations compared to FCB  
340 populations (Table 1.4a and 4b, Figure. 1.4a and 4b). We also observed a significant main effect  
341 of selection and block on starvation resistance in males (Table 1.4a) and in females (Table 1.4b).

342 Compared to FCB populations, resistance to starvation (mean time to death) in FSB males is  
343 lower by approximately 15 hours and in FSB females by about 12 hours (Figure 1.4a and b).

344

### 345 *3.4 Experiment 4: Desiccation resistance*

346 We found significant main effect of selection on female desiccation resistance (Table 1.5b). FSB  
347 females have higher resistance to desiccation (mean time to death) by about one hour and ten  
348 minutes as compared to FCB populations (Figure 1.5b). However, we did not observe an effect  
349 of block or any two-way interaction (i.e. selection  $\times$  block). In case of males, we did not find  
350 any effect of selection or block on desiccation resistance (Table 1.5a).

351

### 352 *3.5 Experiment 5: Resistance to bacterial infection*

353 We did not find any significant main effect of selection on male or female survivorship post  
354 pathogenic challenge (Table 1.6a and 6b). Survivorship in case of males in both FSB and FCB  
355 population is about 58-63% (Figure 1.6a) and in case of female survivorship was about 62-65%  
356 (Figure 1.6b). The results were similar even when data were analyzed using Kaplan-Meier  
357 method.

358

## 359 **4. Discussion**

360 In this study, our aims was to explore the cross-tolerance in the lines that have evolved for the  
361 early recovery in context of reproductive traits such as egg viability, mating frequency, male  
362 mating ability, mating latency, sperm offence ability and progeny production (Singh et al., 2015  
363 and Singh et al., 2016a) post cold stress. In our present experimental evolution study, we



364 measured resistance to starvation, desiccation, heat shock and cold shock, resistance to challenge  
365 with natural pathogen (*Staphylococcus succinus* subsp. *succinus* strain PK-1) *D. melanogaster* in  
366 the populations selected for resistance to cold shock (Singh et al., 2016b). We found higher  
367 mating frequency and adult survivorship in the selected populations relative to their control  
368 populations after the subjection of heat shock or cold shock. Egg viability has increased in the  
369 selected populations post cold shock relative to control populations as we have seen in our  
370 previous study (Singh et al., 2015). Desiccation resistance has increased in females of selected  
371 populations indicating that selection for single type of environmental stress leads to improve  
372 resistance towards other stress also. However, in case of starvation resistance, we found that the  
373 selected populations had lower starvation resistance relative to control populations suggesting  
374 that increased resistance to cold shock is negatively correlated with starvation resistance. We  
375 discuss each of these observations below in more detail.

376  
377 At 0 hour post cold shock, we found approximately 95-97-5% reduction in egg viability. This  
378 could be because below zero temperatures cause sperm mortality in male seminal vesicle, female  
379 seminal receptacle and spermathecae (Lefevre and Jonson, 1962 and Novitski and Rush, 1949).  
380 This result is in line with several other studies that have observed reduced egg viability and  
381 sterility in insects upon exposure to extremes of temperature (Arbogast, 1981, Coulson and Bale,  
382 1992, Saxena et al., 1992 and Singh et al., 2015). However, we found greater egg viability in the  
383 FSB populations compared to FCB populations 24 hours after the subjection cold shock as we  
384 have found previously (Singh et al., 2015). There are a number of possible explanations for  
385 increased egg viability at 24 hours post cold shock: (a) The selected populations could be better  
386 at protecting their stored sperm/eggs from damage caused by heat or cold shock. For instance,

387 Collett and Jarman (2001) have shown that *D. pseudoobscura* females can store the sperm up to  
388 6 months during cold environment. These stored sperm can be used to fertilize ova in warm  
389 environment. However, in our previous study we have shown that *D. melanogaster* females from  
390 the selected populations relative to their control populations does not store the fertilized egg or  
391 sperm we had measured this by assessing the egg viability at different time points after  
392 subjection of the cold shock to the mated females, post cold shock females were not allowed to  
393 accessing of males (Singh et al., 2015).

394  
395 (b) The selected populations mate more after heat or cold shock to enhance egg viability. A  
396 number of studies documented that high and low temperature have an impact on the mating  
397 behavior (Schnebel and Grossfield, 1984, Chakir et al., 2002, David et al., 2005, Dolgin et al.,  
398 2006, David, 2008 and Zhang et al., 2013). However, very few studies have addressed the effect  
399 of cold shock on mating behavior (Singh et al., 2015, Singh et al., 2016a and Singh et al.,  
400 2016b). In FSB populations, the frequency of mating has increased post heat or cold shock  
401 compared to FCB populations. Hence, it is likely that increased mating post heater cold shock is  
402 largely responsible for increase in egg viability. While the pattern of increased mating correlated  
403 with increased egg viability post cold shock had been observed in our previous study (Singh et  
404 al., 2015), it is interesting that this pattern is seen even under heat stress. This finding indicates  
405 that probably some of the mechanisms underlying resistance to heat and cold stress might be  
406 common (such as expression of heat shock proteins). This also forms an example of positive  
407 correlation between resistances to two stressors.

408

409 We found that FSB populations have lower mortality relative to FCB populations over 24 hours  
410 post cold shock. It is important to note that during regular maintenance regime, adult mortality  
411 due to cold shock is negligible. Our results indicate that FSB population have evolved the ability  
412 to withstand cold temperatures in terms of reduced adult mortality along with their ability to  
413 maintain higher egg viability after shock at a temperature of  $-5^{\circ}\text{C}$ . Multiple laboratory selection  
414 studies show increased adult survivorship as a correlated response to selection for cold tolerance  
415 (Anderson et al., 2005, MacMillan et al., 2009, Tucic, 1979 and Chen and Walker, 1993). In our  
416 previous study (Singh et al., 2015), we found that mortality post cold shock was negligible.  
417 However, in the present study, mortality post cold shock is substantial. These results seem quite  
418 contradictory. There are several possible explanations. First, the populations have evolved for  
419 first, number of generations between these two experiments. Second, in the current study, the  
420 flies were virgins when subjected to cold shock whereas in the previous study, the flies had  
421 already mated by the time they were subjected to cold shock. Third, in the present study, the flies  
422 were moved into a fresh food vial soon after eclosion while in the previous study, the flies  
423 remained in the culture vials (with old, spent food) for two days after eclosion. We did a small  
424 experiment (data not shown) to differentiate between possibilities two and three. We used a  
425 factorial combination of mating status and food type to dissect out the effects. The experimental  
426 design was as follows-

|        | Old Food | New Food |
|--------|----------|----------|
| Mated  | X        | X        |
| Virgin | X        | X        |

427

428 The results from this experiment indicate that flies maintained on new food soon after eclosion  
429 have higher mortality than flies maintained on old food soon after eclosion.

430

431 More interestingly, the FSB populations also showed lower mortality post heat shock compared  
432 to FCB populations. The present literature depicts some disagreement with regards to cross-  
433 resistance between cold and heat stress (reviewed in Hoffmann et al., 2003). Anderson et al.  
434 (2005) and MacMillan et al. (2009) did not find correlated increase in heat shock resistance in  
435 populations of *D. melanogaster* selected for faster chill coma recovery or freeze resistance  
436 respectively. Our results are in agreement with those of Kristensen et al. (2007) who show that  
437 cold selected lines of *D. melanogaster* were more heat tolerant and vice versa. Previous studies  
438 in *Drosophila* along latitudinal clines suggest that there is a trade-off between heat and cold  
439 tolerance (Hoffmann et al., 2002). Our results suggest that heat and cold tolerance might be  
440 positively correlated in *D. melanogaster*. There could be multiple explanations for the superior  
441 survivorship of FSB populations post cold shock. (a) Chen and Walker (1994) report that cold  
442 selected lines have higher glycogen and total proteins relative to controls lines. Insects are  
443 known to store various sugars in order to tolerate cold temperatures (Ring and Danks, 1994,  
444 1998). It is possible that the FSB populations have similarly altered resource storage in terms of  
445 carbohydrates, proteins or lipids. (b) Several studies have shown that there are several heat shock  
446 proteins that are expressed both during heat and cold stress. It is quite possible that at least some  
447 of these genes are expressed at a higher level in our populations. However, these genes are  
448 certainly not among the set that we analyzed for expression differences in our other experiment  
449 (Singh et al. Unpublished data).

450 Starvation resistance has decreased in populations selected for increased resistance to cold shock  
451 relative to control populations. Our findings are similar to those of MacMillan et al. (2009) and  
452 Anderson et al. (2005) who found lower starvation resistance in populations of *D. melanogaster*  
453 selected for increased resistance to cold shock. Interestingly, Bublly and Loeschcke (2005) found  
454 decreased cold stress tolerance in populations of *D. melanogaster* selected for increased  
455 starvation resistance. Thus, across multiple studies, the correlation between starvation resistance  
456 and cold stress tolerance seems to be robust.

457 We found that desiccation resistance increased in females of the selected populations. Our  
458 findings are in line with results from other studies (Bublly and Loeschcke, 2005 and Sinclair  
459 et.al., 2009,) which show that increased resistance to cold shock may lead to increased  
460 desiccation resistance as a correlated response. However, populations selected for desiccation  
461 resistance do not show increased cold tolerance (Sinclair et al., 2007). There is at least one  
462 common factor between cold and desiccation resistance that might explain their correlated  
463 evolution. Glycogen is known to act as cryoprotectant (Ramløv and Lee, 2000 and Holmstrup et  
464 al., 2002). Chippindale et al., (1998) showed that selection for increased desiccation resistance  
465 leads to increased glycogen content. Thus, increases in glycogen through selection on cold shock  
466 resistance could in principle lead to evolution of increased desiccation resistance. Other possible  
467 explanation to increased desiccation resistance could be body size in female, in our other related  
468 experiment we found that females from selected populations had higher body weight relative to  
469 females from control populations (data not shown). However, such increase, if any, is likely to  
470 be sex specific since we found no change in the desiccation resistance of FSB and FCB males.

471

472 In insects, cold stress can cause somatic injury to the gut and malphigian tubules. This can open  
473 up a way for the gut flora to enter the haemocoel and thereby cause an infection (Yi and Lee,  
474 2003, MacMillan and Sinclair, 2011, Marshall and Sinclair, 2011 and reviewed in Sinclair et al.,  
475 2013). Therefore, in our selected populations, immune activity can potentially evolve. However,  
476 we did not find any difference between FSB and FCB populations in their immunity against *S.*  
477 *succinus* subsp. *Succinus* strain PK-1. One possibility is that the immune response is elicited only  
478 in response to the gut flora. In *Drosophila*, evolution against a pathogen can be fairly specific  
479 and the host might not have increased immunity against other pathogens (Roxstrom-Lindquist et  
480 al., 2004, Pham et al., 2007 and Mikonranta et al., 2014). Thus, in the present assay, where we  
481 use *Staphylococcus succinus* subsp. *Succinus* PK-1 as the pathogen, the appropriate immune  
482 response might not have been elicited.

483

## 484 **5. Conclusions**

485 In this experimental evolution study, we explored the cross-tolerance in the population of *D.*  
486 *melanogaster* selected for increase resistance to cold stress, we found that cold shock resistance  
487 was positively correlated with heat shock resistance, negatively correlated with starvation  
488 resistance and not correlated with pathogen resistance. More interestingly, cold shock was  
489 positively correlated with desiccation resistance only in the females. Thus, genetic correlations  
490 across traits, at least to some extent seem to be independent of each other and might even be sex-  
491 specific.

492

## 493 **Acknowledgement**

494 We are thankful to Daniel Promislow for kindly providing us the iso-female lines. We thank to  
495 Indian Institute of Science Education and Research Mohali for providing financial support for  
496 this work. Karan Singh thanks to Indian Institute of Science Education and Research Mohali, for  
497 financial support in the form Senior Research Fellowship. We also thank to Manas Arun Samant,  
498 Megha Treesa Tom, Karan Bhatt, Prakhar Gahlotfor laboratory assistance.

499

## 500 **References**

501 Anderson, A.R., Hoffmann, A.A., McKechnie, S.W., 2005. Response to selection for rapid

502 chill-coma recovery in *Drosophila melanogaster*: physiology and life-history traits. *Genet.*

503 *Res.* 85 (1), 15-22.

504 Arbogast, R.T., 1981. Mortality and reproduction of *Ephestia cautella* and *Plodia interpunctella*

505 exposed as pupae to high temperatures. *Environ. Entomol.* 10 (5), 708-710.

506 Bayley, M., Petersen, S.O., Knigge, T., Kohler, H.R., Holmstrup, M., 2001. Drought

507 acclimation

508 confers cold tolerance in the soil collembolan *Rolsomia candida*. *J. Insect Physiol.* 47 (10),

509 1197-1204.

510 Bublik, O.A., Loeschcke, V., 2005. Correlated responses to selection for stress resistance and

511 longevity in a laboratory population of *Drosophila melanogaster*. *J. Evol. Biol.* 18(4), 789-

512 803.

- 513 Chen, C. P., Walker, V. K., 1993. Increase in cold-shock tolerance by selection of cold  
514 resistance lines in *Drosophila melanogaster*. *Ecol. Entomol.* 18(3), 184-190.
- 515 Corby-Harris V, Promislow D.E., 2008. Host ecology shapes geographical variation for  
516 resistance  
517 to bacterial infection in *Drosophila melanogaster*. *J Anim Ecol.* 77(4), 768e76.
- 518 Chippindale, A. K., Gibbs, A. G., Sheik, M., Yee, K. J., Djawdan, M., Bradley, T. J., Rose, M.  
519 R., 1998. Resource acquisition and the evolution of stress resistance in *Drosophila*  
520 *melanogaster*. *Evolution.* 52(5), 1342-1352.
- 521 Collett, J. I., Jarman, M. G., 2001. Adult female *Drosophila pseudoobscura* survive and carry  
522 fertile sperm through long periods in the cold: populations are unlikely to suffer substantial  
523 bottle necks in overwintering. *Evolution.* 55(4), 840-845.
- 524 Coulson, S. C., Bale, J. S., 1992. Effect of rapid cold hardening on reproduction and survival  
525 of offspring in the house fly *Musca domestica*. *J. Insect Physiol.* 38(6), 421-424.
- 526 Crill, W.D., Huey, R.B., Gilchrist, G.W., 1996. Within- and between-generation effects of  
527 temperature on the morphology and physiology of *Drosophila melanogaster*. *Evolution.*  
528 50(3), 1205–1218.
- 529 Hoffmann AA, Scott M, Partridge L, Hallas R., 2003. Overwintering in *Drosophila melanogaster*:  
530 outdoor field cage experiments on clinal and laboratory selected populations help to



- 531 elucidate traits under selection. *J Evol Biol.* 16(4), 614-623.
- 532 Kellett, M., Hoffmann, A.A. McKechnie, S.W., 2005. Hardening capacity in the *Drosophila*  
533 *melanogaster* species group is constrained by basal thermotolerance. *Funct. Ecol.* 19(5), 853-  
534 858.
- 535 Kristensen, T.N., Loeschcke, V., Hoffmann, A.A., 2007. Can artificially selected phenotypes  
536 influence a component of field fitness? Thermal selection and fly performance under  
537 thermal extremes. *Proc. R. Soc. B.* 274(1611), 771-778.
- 538 Kwan, L., Bedhomme, S., Prasad, N. G., Chippindale, A. K., 2008. Sexual conflict and  
539 environmental change: trade-offs within and between the sexes during the evolution of  
540 desiccation resistance. *Journal of Genetics.* 87(4), 383-394.
- 541 Lefevre, G. J., Jonsson, U. B., 1962. The effect of cold shock on *Drosophila melanogaster*  
542 sperm.  
543 *Drosoph Inform Serv.* 36, 86-87.
- 544 MacMillan, H.A., Walsh, J.P., Sinclair, B.J., 2009. The effects of selection for cold tolerance  
545 on cross tolerance to other environmental stressors in *Drosophila melanogaster* Meigen.  
546 *Insect Sci.* 16(3), 263-276.
- 547 MacMillan H.A., Sinclair B.J., 2011. Mechanisms underlying insect chill-coma. *J Insect Physiol.*  
548 57(1), 12-20.

- 549 Marshall K.E., Sinclair B.J., 2011. The sub-lethal effects of repeated freezing in the woolly bear  
550 caterpillar *Pyrrharctia isabella*. J Exp Biol. 214 (7), 1205-1212.
- 551 Mikonranta L., Mappes J., Kaukoniitty M., Freitak D., 2014. Insect immunity: oral exposure to a  
552 bacterial pathogen elicits free radical response and protects from a recurring  
553 infection. Front Zool. 11(1), 23.
- 554 Novitski, E., Rush, G., 1949. Viability and fertility of *Drosophila* exposed to sub-zero  
555 temperatures. Biol. Bull. 97(2), 150-157.
- 556 Overgaard, J., Sørensen, J.G., Petersen, S.O., Loeschcke, V., Holmstrup, M., 2006.  
557 Reorganization of membrane lipids during fast and slow cold hardening in *Drosophila*  
558 *melanogaster*. Physiol. Entomol. 31(4), 328-335.
- 559 Phelan, J.P., Archer, M.A., Beckman, K.A., Chippindale, A.K., Nusbaum, T.J., Rose, M.R.,  
560 2003. Breakdown in correlations during laboratory evolution. I. Comparative analyses of  
561 *Drosophila* populations. Evolution. 57(3), 527-535.
- 562 Pham L.N., Dionne M.S., Shirasu-Hiza M., Schneider D.S., 2007. A Specific Primed Immune  
563 Response in *Drosophila* Is Dependent on Phagocytes. PLoS Pathog. 3(3), e26.
- 564 Ramløv, H., Lee, R.E Jr., 2000. Extreme resistance to desiccation in overwintering larvae of  
565 the gall fly *Eurosta solidaginis* (Diptera, Tephritidae). J. Exp. Biol. 203 (4), 783-789.
- 566 Ring, R.A., Danks, H.V., 1994. Desiccation and cryoprotection: Overlapping adaptations. Cryo

- 567 Lett. 15, 181-190.
- 568 Rohmer, C., David, J. R., Moreteau, B., Joly, D., 2004. Heat induced male sterility in  
569 *Drosophila melanogaster*: adaptive genetic variations among geographic populations and  
570 role of the Y chromosome. *J. Exp. Biol.* 207(16), 2735-43.
- 571 Nghiem D., Gibbs A.G., Rose M.R., Bradley T.J.. 2000. Postponed aging and desiccation  
572 resistance in *Drosophila melanogaster*. *Exp Geront.* 35: 957-969.
- 573 Ring R.A., Danks H.V., 1994. Desiccation and cryoprotection: Overlapping adaptations.  
574 *Cryo Lett.* 15: 181-190.
- 575 Ring R.A., Danks H., 1998. The role of trehalose in cold-hardiness and desiccation. *Cryo Lett.* 19:  
576 275-282.
- 577 StRoxstrom-Lindquist K., Terenius O., Faye I., 2004. Parasite specific immune response in adult  
578 *Drosophila melanogaster*: a genomic study. *EMBO reports.* 5 (2), 207-212.
- 579 MacMillan, H. A., Walsh, J. P., & Sinclair, B. J., 2009. The effects of selection for cold tolerance  
580 on cross-tolerance to other environmental stressors in *Drosophila melanogaster*. *Insect*  
581 *Science*, 16(3), 263-276.
- 582  
583 Sinclair, B.J., Nelson, S., Nilson, T.L., Roberts, S.P., Gibbs, A.G., 2007. The effect of  
584 selection for desiccation resistance on cold tolerance of *Drosophila melanogaster*. *Physiol.*  
585 *Entomol.* 32(4), 322-327.

586 Singh K., Kochar E., Prasad N.G., 2015. Egg viability, mating frequency and male mating ability  
587 evolve in populations of *Drosophila melanogaster* selected for resistance to cold shock.  
588 PLoS One. 10(6) e0129992.

589 Singh, K., Samant, M. A., Tom, M. T., & Prasad, N. G. (2016a). Evolution of pre-and post-  
590 copulatory traits in male *Drosophila melanogaster* as a correlated response to selection  
591 for  
592 resistance to cold stress. *PloS one*, 11(4), e0153629.

593 Singh, K., Zulkifli, M., & Prasad, N. G. (2016b). Identification and characterization of novel  
594 natural pathogen of *Drosophila melanogaster* isolated from wild captured *Drosophila*  
595 spp. *Microbes and infection*, 18(12), 813-821.

596 Saxena, B.P., Sharma, P.R., Thappa, R.K., Tikku, K., 1992. Temperature induced sterilization  
597 for control of three stored grain beetles. *Journal of Stored Product Research*, 28(1), 67-70.

598 Wu BS, Lee, JK, Thompson, KM, Walker, VK, Moyes, CD, Robertson, RM., 2002. Anoxia  
599 induces thermo tolerance in the locust flight system. *J Exp Biol*. 205(6), 815-827.

600 Yi S.X., Lee R.E., 2003. Detecting freeze injury and seasonal cold-hardening of cells and tissues  
601 in the gall fly larvae, *Eurosta solidaginis* (Diptera: Tephritidae) using fluorescent vital  
602 dyes. *J Insect Physiol*. 49(11), 999-1004.

603

604

605

606

607

608

609

610

611

612

613

614 **Tables and Figures:**

615

616 **Table 7.1.** Summary of results of a four-factor mixed model ANOVA on egg viability with  
617 selection regime (FSB and FCB), period (0 hour and 24 hours) and Treatment (Cold Shock, Heat  
618 Shock, No Shock) as the fixed factors crossed with blocks (1-5) as random factor. *p*-values in  
619 bold are statistically significant.

| <b>Effect</b>   | <b>SS</b> | <b>MS Num</b> | <b>DF Num</b> | <b>DF Den</b> | <b>F ratio</b> | <b>P</b>         |
|-----------------|-----------|---------------|---------------|---------------|----------------|------------------|
| Selection (Sel) | 809.927   | 809.927       | 1             | 4.000         | 32.281         | <b>0.005</b>     |
| Period (Per)    | 10548.740 | 10548.740     | 1             | 4.000         | 85.652         | <b>0.001</b>     |
| Block (Blk)     | 372.991   | 93.248        | 4             | 0.800         | 1.299          | 0.603            |
| Treatment (Trt) | 68439.490 | 34219.740     | 2             | 8.000         | 480.344        | <b>&lt;0.001</b> |

|                    |          |          |   |       |        |                  |
|--------------------|----------|----------|---|-------|--------|------------------|
| Sel × Per          | 1152.285 | 1152.285 | 1 | 4.000 | 21.762 | <b>0.010</b>     |
| Sel× Blk           | 100.358  | 25.090   | 4 | 4.000 | 0.383  | 0.812            |
| Sel× Trt           | 1337.526 | 668.763  | 2 | 8.000 | 15.001 | <b>0.002</b>     |
| Per× Blk           | 492.633  | 123.158  | 4 | 6.400 | 1.194  | 0.398            |
| Per× Trt           | 6370.580 | 3185.290 | 2 | 8.000 | 38.732 | <b>&lt;0.001</b> |
| Blk× Trt           | 569.920  | 71.240   | 8 | 7.400 | 0.752  | 0.653            |
| Sel× Per× Blk      | 211.798  | 52.950   | 4 | 8.000 | 1.653  | 0.253            |
| Sel× Per× Trt      | 1107.268 | 553.634  | 2 | 8.000 | 17.280 | <b>0.001</b>     |
| Sel× Blk× Trt      | 356.647  | 44.581   | 8 | 8.000 | 1.391  | 0.326            |
| Per× Blk× Trt      | 657.908  | 82.238   | 8 | 8.000 | 2.567  | 0.102            |
| Sel× Per× Blk× Trt | 256.309  | 32.039   | 8 | .     | .      | .                |

620

621

622

623

624 **Table 7.2.** Summary of the results of a three-factor mixed model ANOVA on mating number  
 625 with selection regime (FSB and FCB) and treatment (cold shock, heat shock or no shock) as  
 626 fixed factors crossed with blocks (1-5) as random factor. For mating number the sum of all  
 627 observed matings until 36 hours post treatment for each population was used as the unit of  
 628 analysis. *p*-values in bold are statistically significant.

| <b>Effect</b>   | <b>SS</b> | <b>MS Num</b> | <b>DF Num</b> | <b>DF Den</b> | <b>F ratio</b> | <b>P</b>     |
|-----------------|-----------|---------------|---------------|---------------|----------------|--------------|
| Selection (Sel) | 6424.033  | 6424.033      | 1             | 4.000         | 36.134         | <b>0.004</b> |
| Block (Blk)     | 3151.533  | 787.883       | 4             | 7.545         | 1.392          | 0.323        |
| Treatment (Trt) | 6744.800  | 3372.400      | 2             | 8.000         | 6.597          | <b>0.020</b> |
| Sel×Blk         | 711.133   | 177.783       | 4             | 8.000         | 1.446          | 0.304        |

|             |          |          |   |       |        |              |
|-------------|----------|----------|---|-------|--------|--------------|
| Sel×Trt     | 3819.467 | 1909.733 | 2 | 8.000 | 15.528 | <b>0.002</b> |
| Blk×Trt     | 4089.867 | 511.233  | 8 | 8.000 | 4.157  | <b>0.030</b> |
| Sel×Blk×Trt | 983.867  | 122.983  | 8 | .     | .      | .            |

629

630

631

632

633

634

635

636

637

638 **Table 7.3.** Summary of the results of two-factor mixed model ANOVA on mortality in male (a)  
 639 and in female (b) post cold shock and on mortality in male (c) and in female (d) post heat shock  
 640 with selection regime (FSB and FCB) as the fixed factor crossed with block (1-5) as random  
 641 factor. *p*-values in bold are statistically significant.

| Trait      | Effect          | SS    | MS Num | DF Num | DF Den | <i>F</i> ratio | <i>P</i>     |
|------------|-----------------|-------|--------|--------|--------|----------------|--------------|
| (a)        | Selection (Sel) | 0.566 | 0.566  | 1      | 4      | 40.209         | <b>0.003</b> |
| Male       | Block (Blk)     | 0.296 | 0.074  | 4      | 4      | 5.245          | 0.069        |
| cold shock | Sel×Blk         | 0.056 | 0.014  | 4      | 20     | 2.138          | 0.114        |
| (b)        | Selection (Sel) | 0.637 | 0.637  | 1      | 4      | 52.076         | <b>0.002</b> |

|            |                 |       |       |   |    |        |              |
|------------|-----------------|-------|-------|---|----|--------|--------------|
| Female     | Block (Blk)     | 0.268 | 0.067 | 4 | 4  | 5.486  | 0.064        |
| cold shock | Sel×Blk         | 0.049 | 0.012 | 4 | 20 | 2.240  | 0.101        |
| (c)        | Selection (Sel) | 0.154 | 0.154 | 1 | 4  | 69.272 | <b>0.001</b> |
| Male       | Block (Blk)     | 0.227 | 0.057 | 4 | 4  | 25.460 | <b>0.004</b> |
| heat shock | Sel×Blk         | 0.009 | 0.002 | 4 | 20 | 0.206  | 0.932        |
| (d)        | Selection (Sel) | 0.105 | 0.105 | 1 | 4  | 60.146 | <b>0.001</b> |
| female     | Block (Blk)     | 0.026 | 0.006 | 4 | 4  | 3.737  | 0.115        |
| heat shock | Sel×Blk         | 0.007 | 0.002 | 4 | 20 | 0.630  | 0.647        |

642

643

644

645

646

647

648 **Table 7.4.** Summary of the results from two-factor mixed model ANOVA on resistance to  
 649 starvation in Males (a) and Females (b) with selection regime (FSB and FCB) as the fixed factor  
 650 crossed with random blocks (1-5). Mean time to death in hours for each vial was used as the unit  
 651 of analysis. *p*-values in bold are statistically significant.

| Trait      | Effect          | SS        | MS Num   | DF Num | DF Den | F ratio | P            |
|------------|-----------------|-----------|----------|--------|--------|---------|--------------|
| (a)        | Selection (Sel) | 3895.987  | 3895.987 | 1      | 4      | 9.621   | <b>0.036</b> |
| Male       | Block (Blk)     | 27014.640 | 6753.661 | 4      | 4      | 16.678  | <b>0.009</b> |
| starvation | Sel×Blk         | 1619.819  | 404.955  | 4      | 60     | 2.515   | 0.051        |
| (b)        | Selection (Sel) | 2615.800  | 2615.800 | 1      | 4      | 8.713   | <b>0.042</b> |



|            |             |          |          |   |    |       |              |
|------------|-------------|----------|----------|---|----|-------|--------------|
| Female     | Block (Blk) | 8144.076 | 2036.019 | 4 | 4  | 6.782 | <b>0.045</b> |
| starvation | Sel×Blk     | 1200.860 | 300.215  | 4 | 60 | 0.799 | 0.530        |

652

653

654

655

656

657

658

659

660

661

662 **Table 7.5.** Summary of results from a two-factor mixed model ANOVA on resistance to  
663 desiccation in Males (a) and Females (b) using Selection regime (FCB and FSB) as fixed factor  
664 crossed with random Block (1-5). Mean time to death in hours for each vial was used as the unit  
665 of analysis. *p*-values in bold are statistically significant.

| Trait | Effect          | SS         | MS Num    | DF Num | DF Den | <i>F</i> ratio | <i>P</i> |
|-------|-----------------|------------|-----------|--------|--------|----------------|----------|
| (a)   | Selection (Sel) | 18812.010  | 18812.010 | 1      | 4      | 1.106          | 0.352    |
| Male  | Block (Blk)     | 248600.700 | 62150.180 | 4      | 4      | 3.654          | 0.119    |

|             |                 |            |            |   |    |        |                  |
|-------------|-----------------|------------|------------|---|----|--------|------------------|
| Desiccation | Sel×Blk         | 68032.720  | 17008.180  | 4 | 60 | 6.778  | <b>&lt;0.001</b> |
| (b)         | Selection (Sel) | 108723.600 | 108723.600 | 1 | 4  | 16.430 | <b>0.015</b>     |
| Female      | Block (Blk)     | 57620.890  | 14405.220  | 4 | 4  | 2.177  | 0.235            |
| Desiccation | Sel×Blk         | 26469.110  | 6617.276   | 4 | 60 | 0.757  | 0.558            |

666

667

668

669

670

671

672

673

674 **Table 7.6:**Summary of results of a two-factor mixed model ANOVA on proportion of  
675 survivorship post bacterial infection in males (a) and females (b) with selection regime (FSB and  
676 FCB) as the fixed factor crossed with blocks (1-5) as random factor. *p*-values in bold are  
677 statistically significant.

| Traits       | Effect          | SS    | MS Num | DF Num | DF Den | <i>F</i> ratio | <i>P</i> |
|--------------|-----------------|-------|--------|--------|--------|----------------|----------|
| (a)          | Selection (Sel) | 0.001 | 0.001  | 1      | 4      | 2.107          | 0.220    |
| Male         | Block (Blk)     | 0.011 | 0.003  | 4      | 4      | 3.963          | 0.105    |
| survivorship | Sel×Blk         | 0.003 | 0.001  | 4      | .      | .              | .        |

|              |                 |       |       |   |   |       |       |
|--------------|-----------------|-------|-------|---|---|-------|-------|
| (b)          | Selection (Sel) | 0.003 | 0.003 | 1 | 4 | 3.114 | 0.152 |
| Female       | Block (Blk)     | 0.006 | 0.002 | 4 | 4 | 1.862 | 0.281 |
| survivorship | Sel×Blk         | 0.003 | 0.001 | 4 | . | .     | .     |

678

679

680

681

682

683

684

685

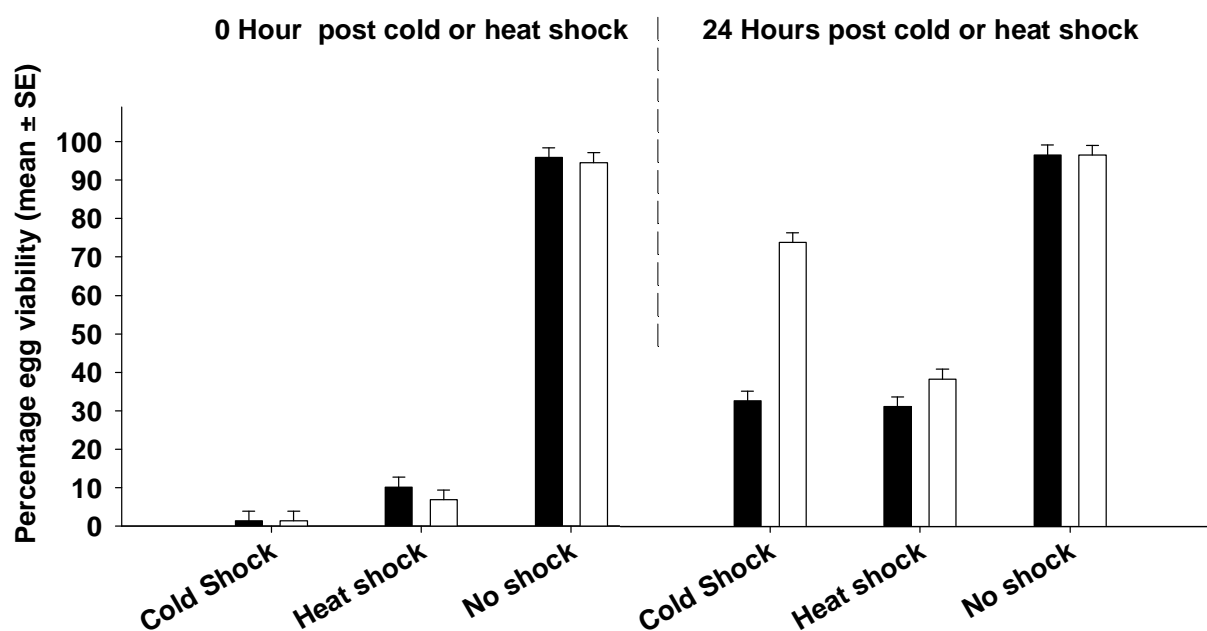

686

687

688 **Figure 7.1:** Effect of cold shock or heat shock on egg viability. We measured egg viability at 0

689 and 24 hours post heat/cold shock. Open bars represent FSB and closed bars represent FCB

690 populations. Viability of eggs from No-shock treatment was high with no difference between  
691 FCB and FSB populations. At 0 hours post cold shock, viability of eggs from the cold-shock and  
692 heat-shock treatment was very low and not different between FCB and FSB populations.  
693 However, 24 hours post cold shock, egg viability improved and the FSB populations had  
694 significantly higher egg viability than the FCB populations.

695

696

697

698

699

700

701

702

703

704

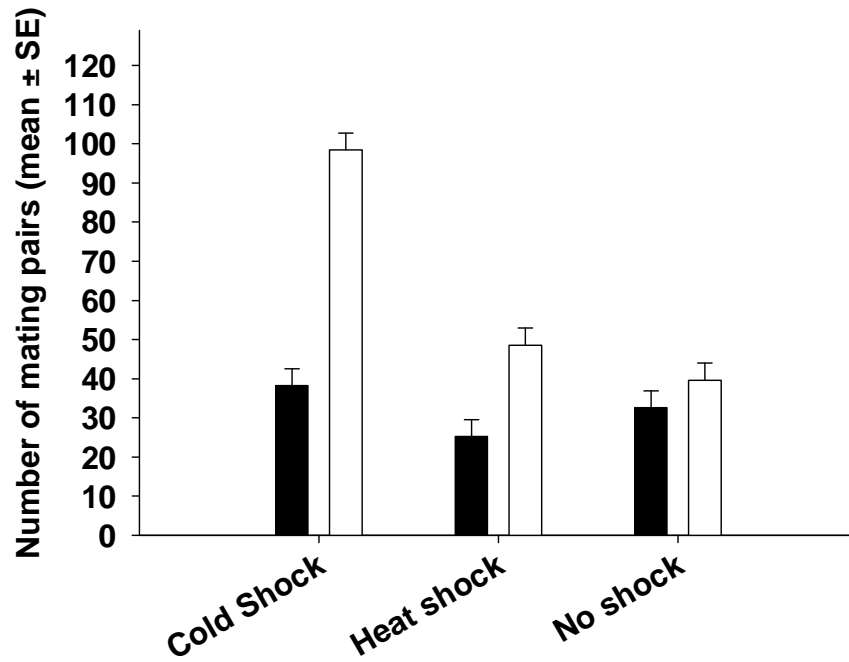

705

706 **Figure 7.2:** Effect of cold shock or heat shock on mating. We assayed mating frequency post  
707 heat or cold shock (0-36 hours). Open bars represent FSB and closed bars represent FCB  
708 populations. The number of mating pairs observed in FSB flies from cold-shock and heat shock  
709 treatment was significantly higher relative to FCB populations.

710

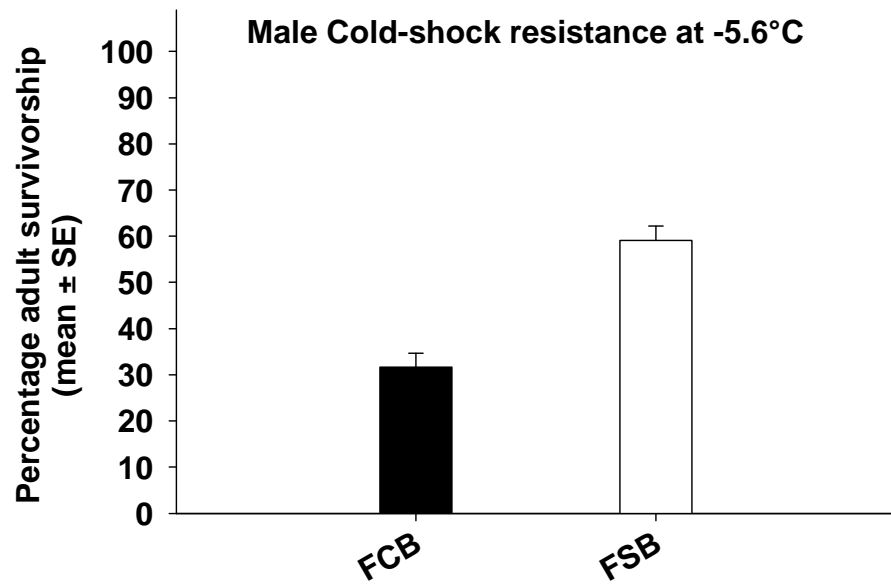

711

712 **Figure 7.3a:** Effect of cold shock on survivorship of virgin males. FSB populations had  
713 significantly higher survivorship relative to FCB populations.

714

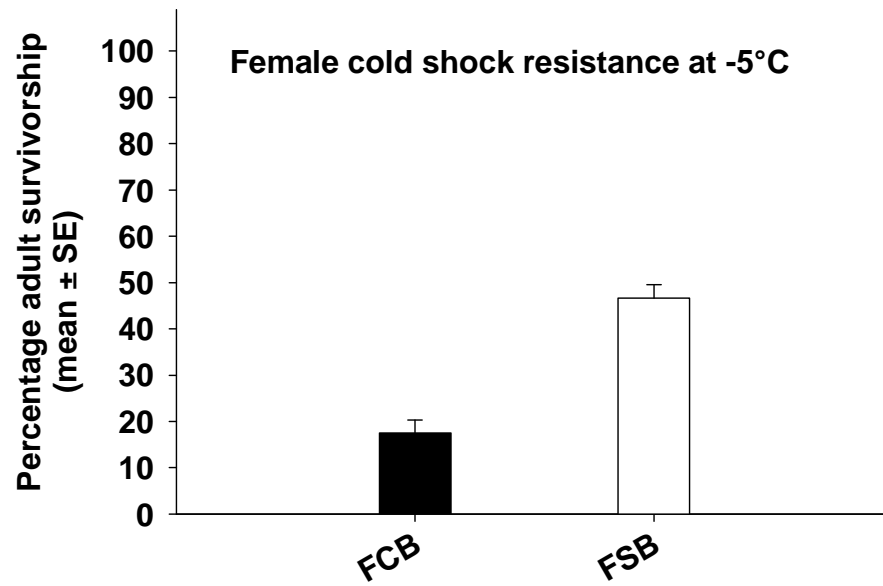

715

716 **Figure 7.3b:** Effect of cold shock on survivorship of virgin females. FSB populations had higher

717 survivorship relative to FCB populations.

718

719

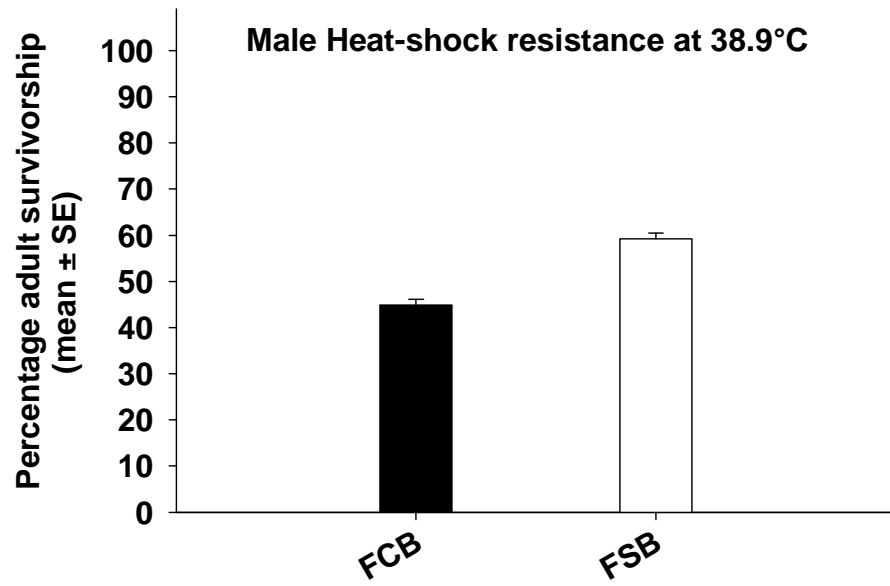

720

721 **Figure 7.3c:** Effect of heat shock on survivorship of virgin males. FSB populations had higher

722 survivorship relative to FCB populations.

723

724

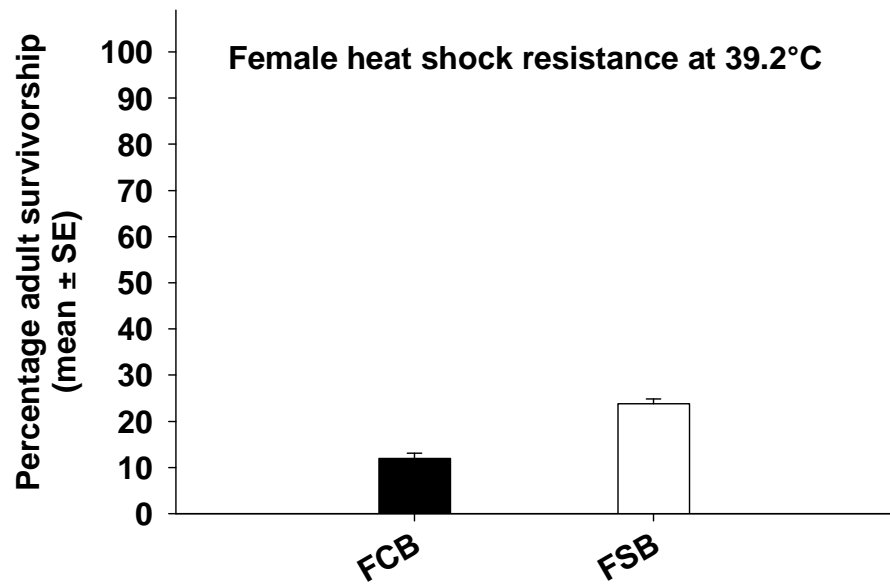

725



726 **Figure 7.3d:**Effect of heat shock on survivorship of virgin female FSB populations had higher  
727 survivorship relative to FCB populations.

728

729

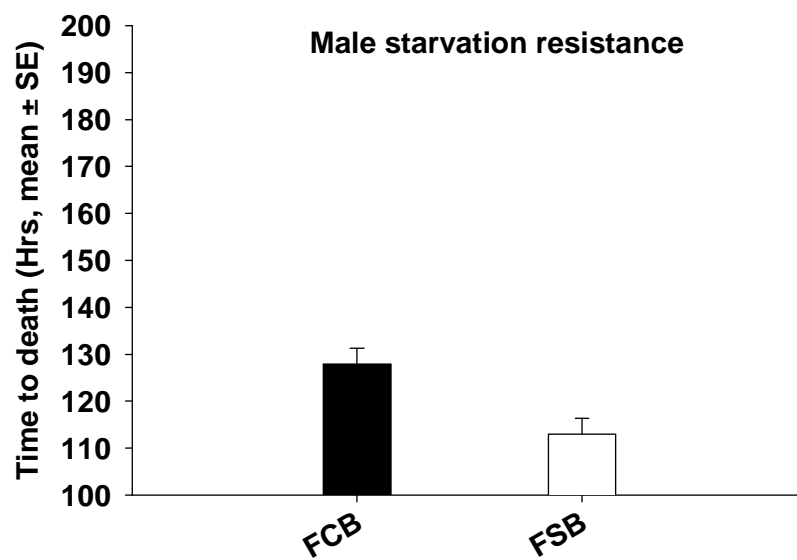

730

731 **Figure 7.4a:** Starvation resistance in males. FSB populations had lower starvation resistance  
732 relative to FCB populations.

733

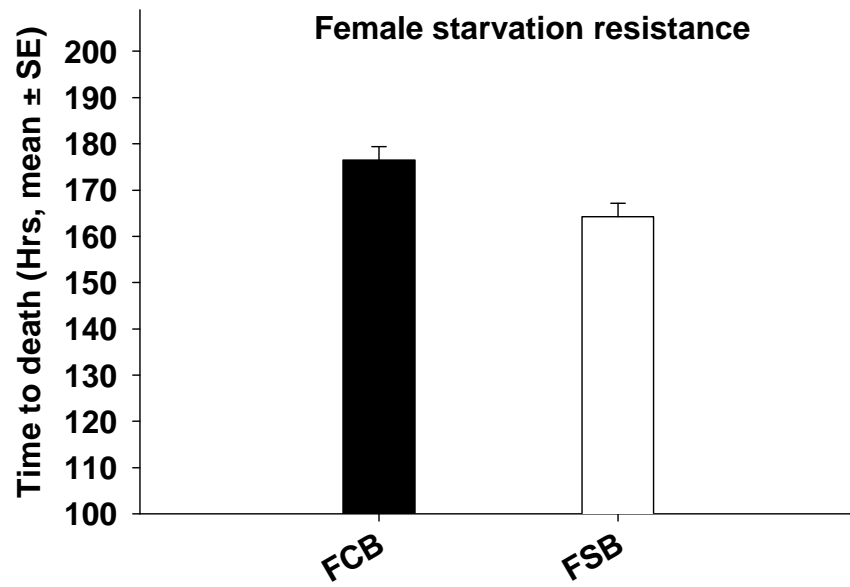

734

735

736 **Figure 7.4b:** Starvation resistance in females. FSB populations had lower starvation resistance

737 relative to FCB populations.

738

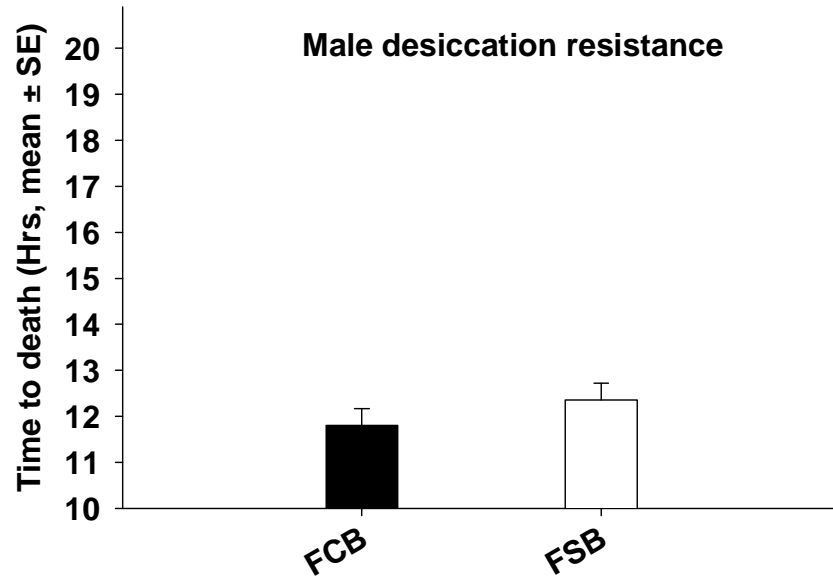

739

740

741 **Figure 7.5a:**Desiccation resistance in males. I did not find any significant main effect of

742 selection on mean time to death.

743

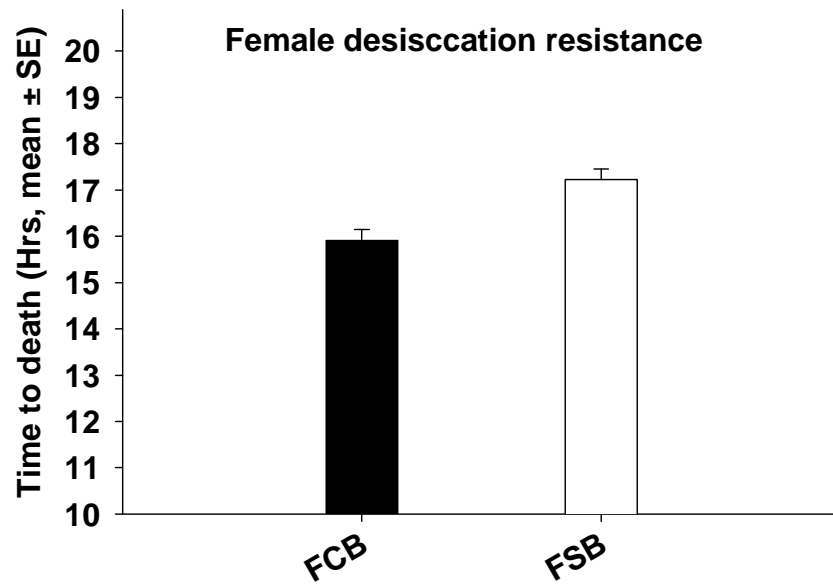

744

745 **Figure 7.5b:**Desiccation resistance in females. I found significant main effect of selection on  
746 desiccation resistance, indicating that FSB populations had higher desiccation resistance relative  
747 to FCB populations.

748

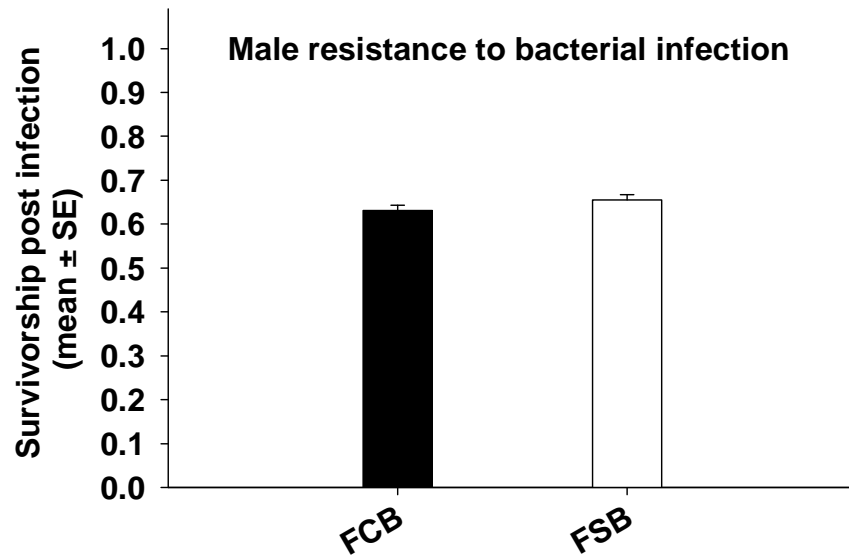

749

750 **Figure 7.6a:**Male survivorship post infection. There was no difference between FSB and FCB

751 males in their survivorship post infection.

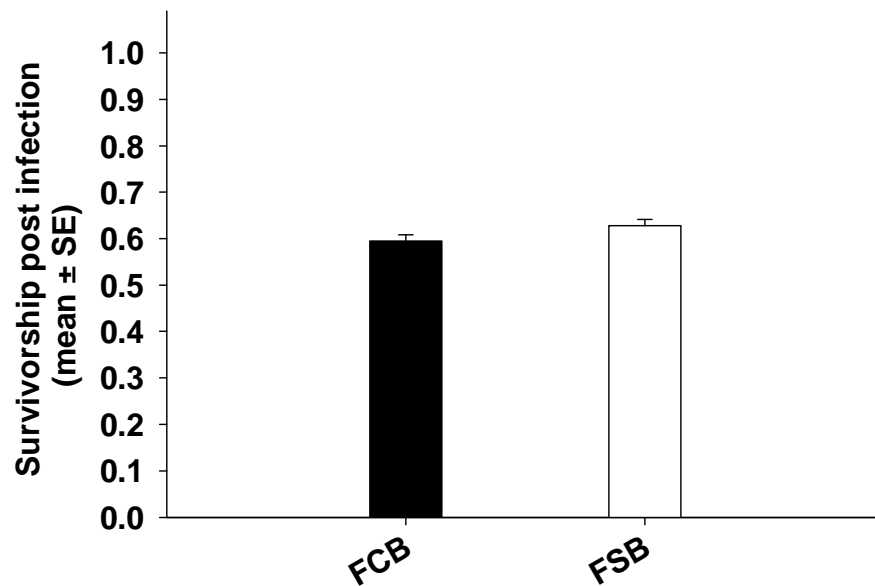

752

753 **Figure 7.6b:**Female survivorship post infection. We did not observe any significant difference

754 between FSB and FCB female survivorship post infection.

755
